# Supplementary material
Source: PubMed Central journal article supplement (PMC4042076)
Supplement: me-14-1003.pdf [file me-14-1003.pdf]

## SUPPLEMENTAL FIGURE LEGENDS

**FIG. S1.** Mouse urine and blood constituents. (A) Urine was collected daily from pregnant mice at 15.5 dpc to 18.5 dpc. Urine albumin and creatinine were assayed in WT dams treated with  $ERR\gamma$  agonist DY131 or vehicle (DMSO). (B) Urine was collected daily from 14.5 dpc to 18.5 dpc. Total urine potassium excretion over each 24 h period was assayed in  $ERR\gamma^{+/-}$  and WT dams. (C) Serum potassium was assayed in  $ERR\gamma^{+/-}$  and WT dams at 18.5 dpc. Values are means  $\pm$  SEM. **\*\* $P$ <0.01.**

**FIG. S2.**  $ERR\gamma$  deficient mice have lower blood pressure during pregnancy and postpartum. Systolic blood pressure was measured from 14.5 dpc to 18.5 dpc in the following groups: (A) WT ♀ mated either with WT ♂ ( $\text{♀WT} \times \text{♂WT}$ ) or with  $ERR\gamma^{+/-}$  ♂ ( $\text{♀WT} \times \text{♂HET}$ ); (B)  $ERR\gamma^{+/-}$  ♀ mated either with  $ERR\gamma^{+/-}$  ♂ ( $\text{♀HET} \times \text{♂HET}$ ) or WT ♂ ( $\text{♀HET} \times \text{♂WT}$ ). (C) Systolic blood pressure was measured in  $ERR\gamma^{+/-}$  ♀ mated with WT ♂ (WT) and WT ♀ (mated with  $ERR\gamma^{+/-}$  ♂) from 14.5 dpc to 18.5 dpc and from postpartum days 9 to day 13. Systolic blood pressure was measured from 14.5 dpc to 18.5 dpc in the following groups: (D) WT ♀ mated with WT ♂ with (L-NAME WT) or without (Nontreated WT) treatment with the e-NOS inhibitor, L-NAME; (E)  $ERR\gamma^{+/-}$  ♀ mated with  $ERR\gamma^{+/-}$  ♂ with (L-NAME HET) or without (Nontreated HET) treatment with L-NAME; (F) WT ♀ mated with WT ♂ with (2% salt WT) or without (Nontreated WT) high salt (2%) treatment; (G)  $ERR\gamma^{+/-}$  ♀ mated with  $ERR\gamma^{+/-}$  ♂ with (2% salt HET) or without (Nontreated HET) high salt treatment. Values are means  $\pm$  SEM. **\* $P$ <0.05, \*\* $P$ <0.01, \*\*\* $P$ <0.001.**

**FIG. S3.**  $ERR\gamma$  is expressed both in labyrinth and spongiotrophoblast of mouse placenta. (A) Wild type (WT),  $ERR\gamma^{+/-}$  (HET) and  $ERR\gamma^{-/-}$  (HOMO) placentas from  $ERR\gamma^{+/-}$  dams were collected at 18.5 dpc;

labyrinth and spongiotrophoblast enriched tissues were microdissected. mRNA expression of  $ERR\gamma$  was analyzed by qRT-PCR; RPLP0 was used as the internal reference. Values are means  $\pm$  SEM,  $**P<0.01$ .  $***P<0.001$ . (B) Proteins isolated from WT and  $ERR\gamma^{+/-}$  placentas from  $ERR\gamma^{+/-}$  dams at 18.5 dpc were analyzed by immunoblotting using antisera to  $ERR\gamma$  or  $\beta$ -actin, as loading control.

**FIG. S4.** Renin-angiotensin system was unaltered in the kidneys of  $ERR\gamma^{+/-}$  pregnant mice. RNA was isolated from the kidneys of  $ERR\gamma^{+/-}$  or WT dams at 18.5 dpc. mRNA expression of angiotensinogen, renin, angiotensin I converting enzyme 1 (*Ace1*), angiotensin I converting enzyme 2 (*Ace2*) and angiotensin II type 1a receptor (*Agtr1a*) was analyzed by qRT-PCR; RPLP0 was used as the internal reference.

**FIG. S5.** *Cyp11a1* and *Cyp21* expression was unaltered in adrenal glands of  $ERR\gamma^{+/-}$  non-pregnant mice. RNA isolated from adrenal glands of  $ERR\gamma^{+/-}$  or WT non-pregnant mice was analyzed for mRNA expression of *Cyp11a1* and *Cyp21* by qRT-PCR; RPLP0 was used as the internal reference. Values are means  $\pm$  SEM.  $*P<0.05$ .

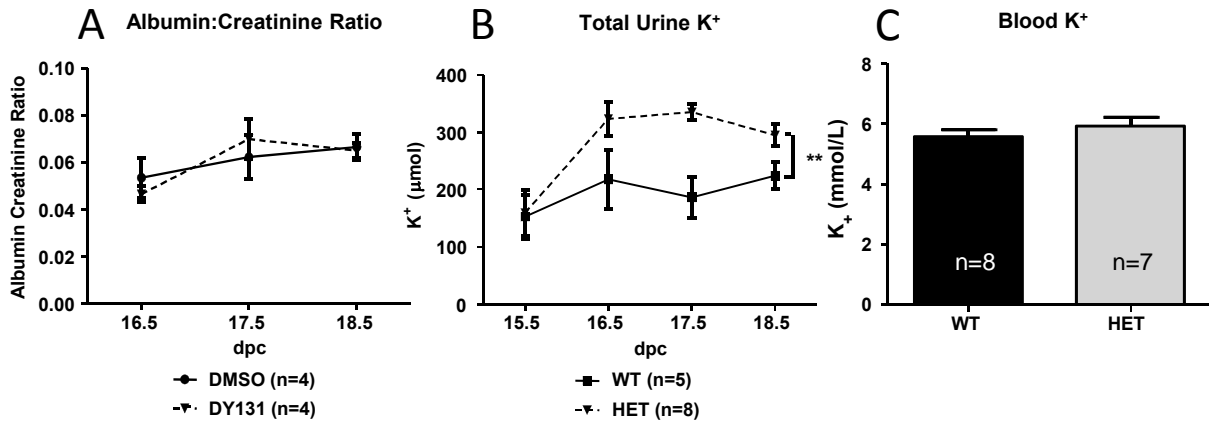

Figure S1

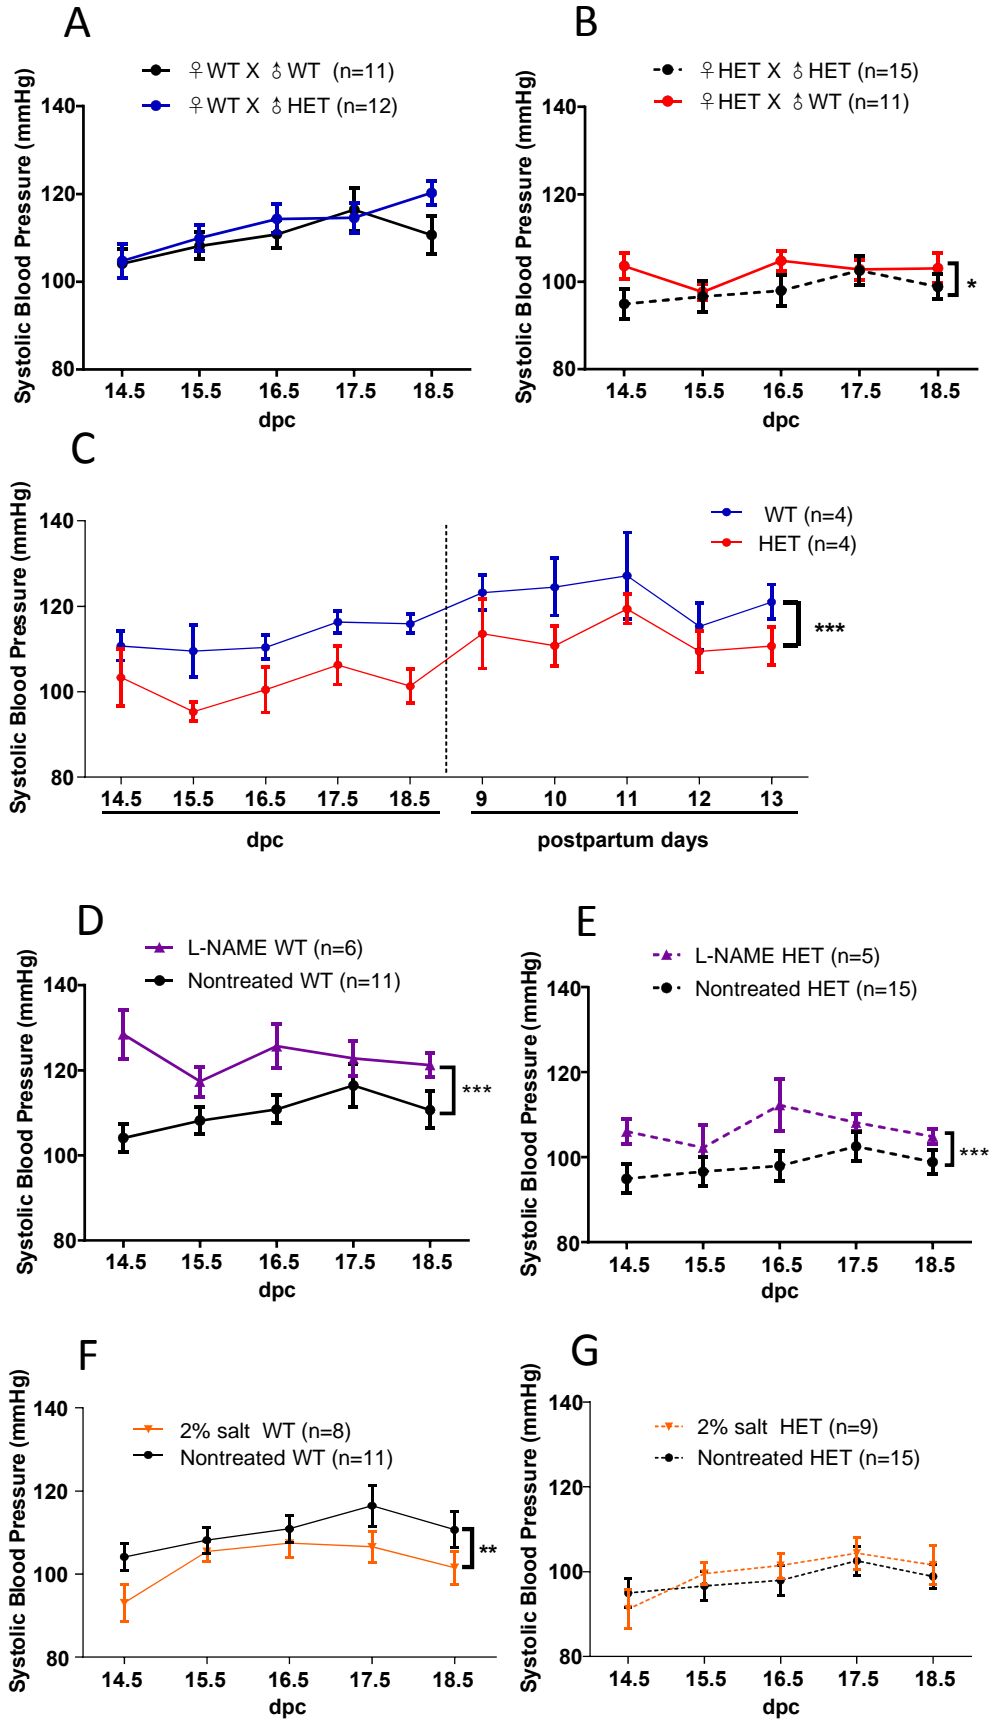

A

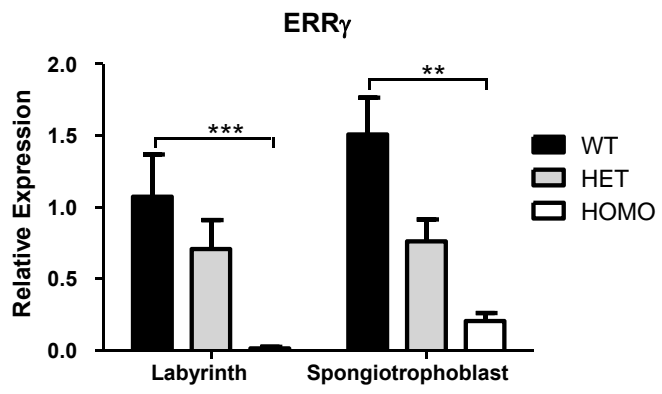

B

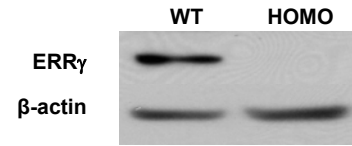

Figure S3

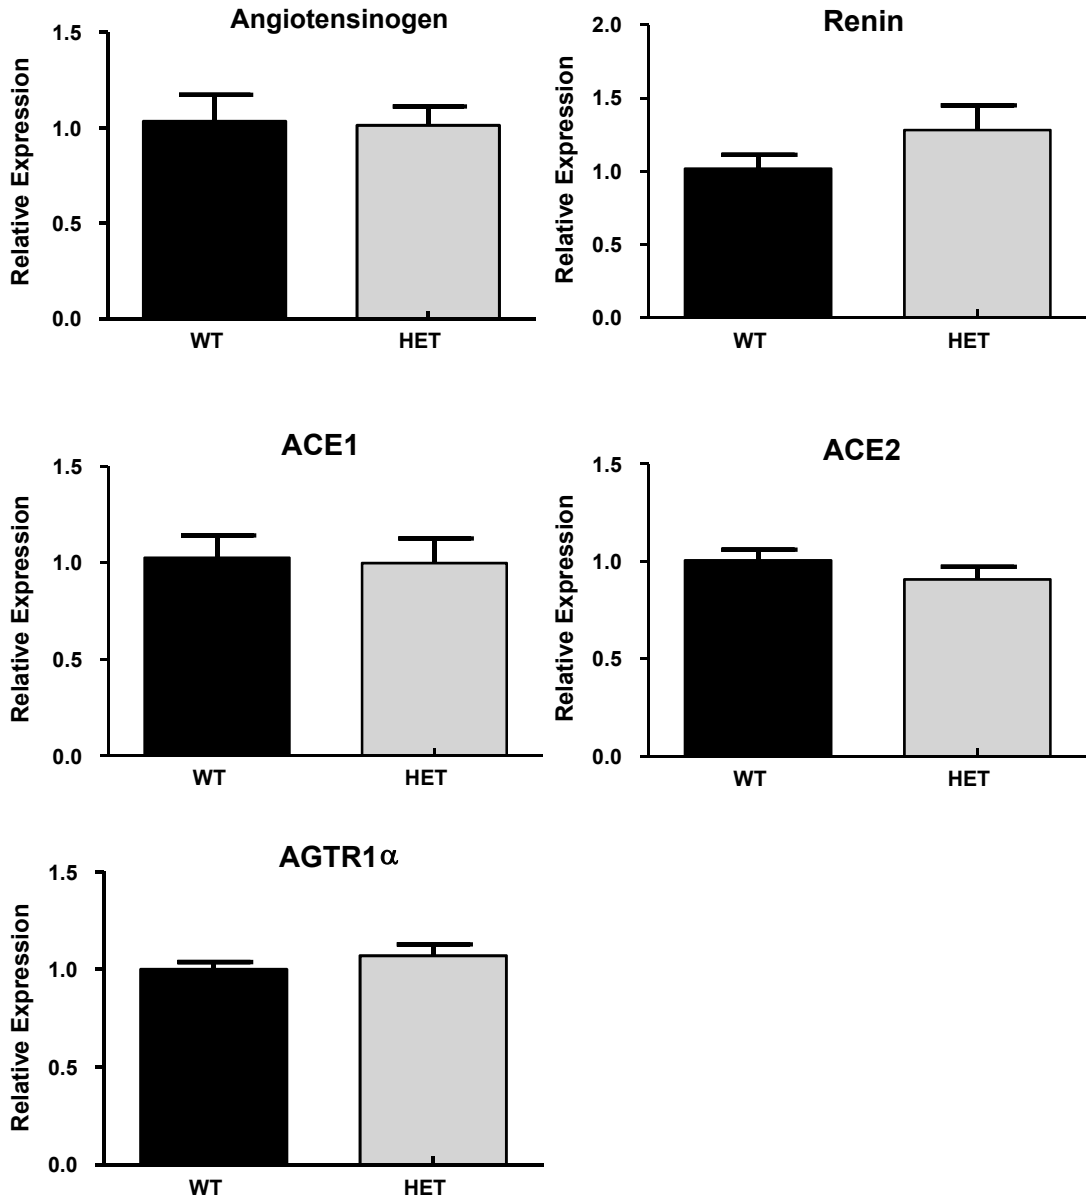

Figure S4

A

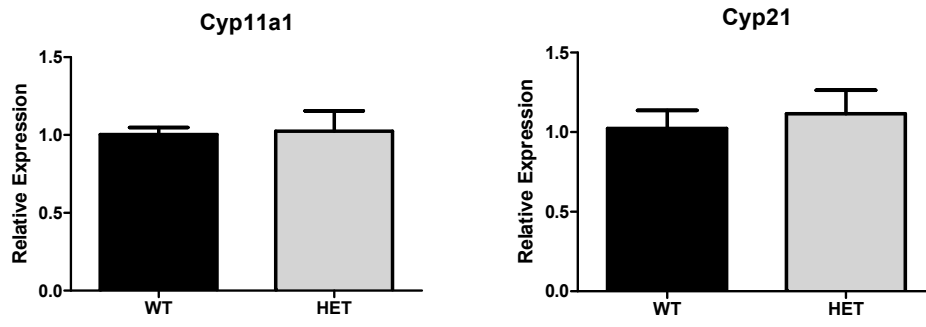

Figure S5
